# Supplementary material for: Outcome of Irrigation and Debridement with Topical Antibiotic Delivery Using Antibiotic-Impregnated Calcium Hydroxyapatite for the Management of Periprosthetic Hip Joint Infection
Source: MDPI journal article supplement (doi:10.3390/antibiotics12050938), 2023-05-21
Supplement: s1 [file s1]

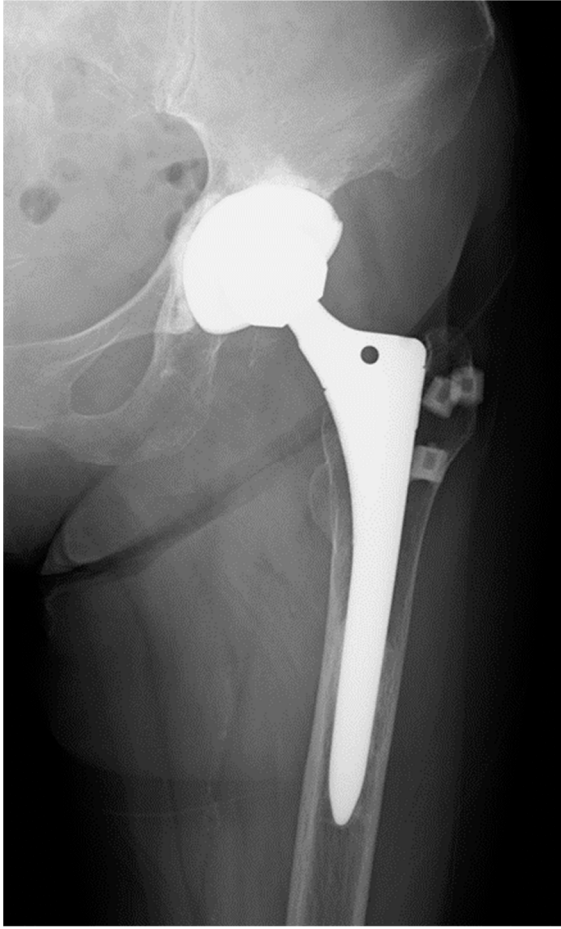

Figure S1. Radiographs of the left hip of a 74-year-old woman.

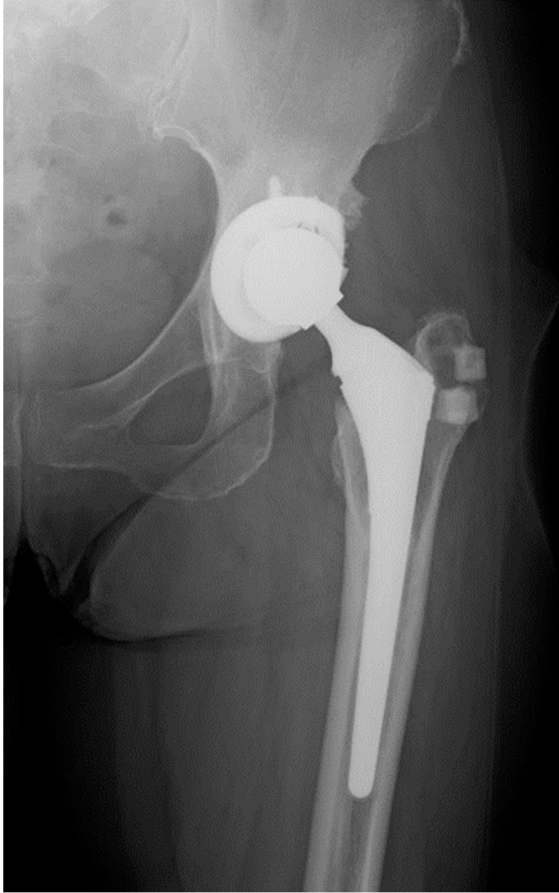

Figure S2. Radiographs of the left hip of a 63-year-old woman.

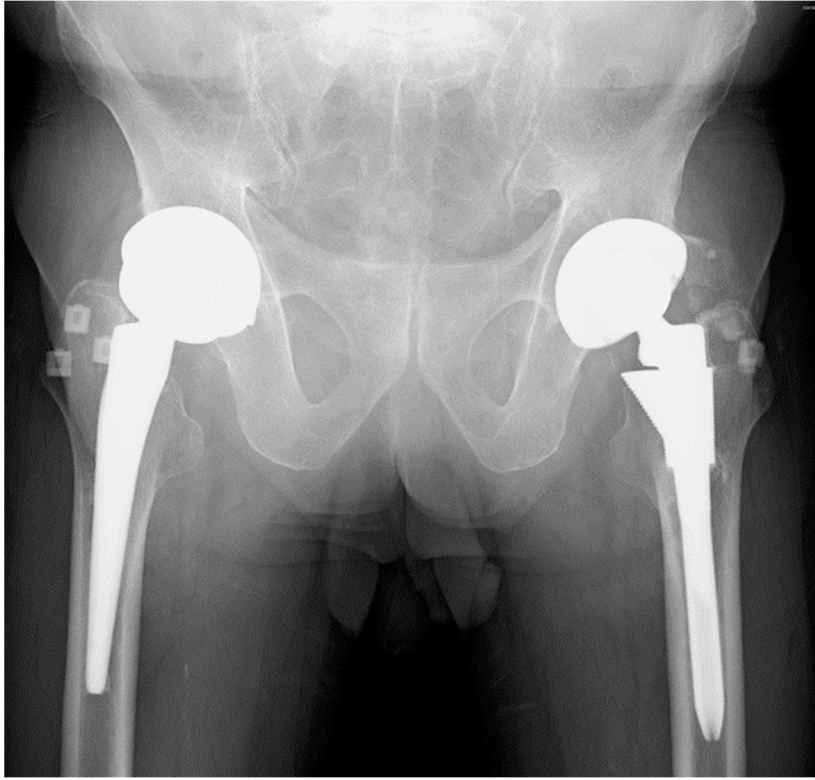

Figure S3. Radiographs of the both hips of a 71-year-old man.

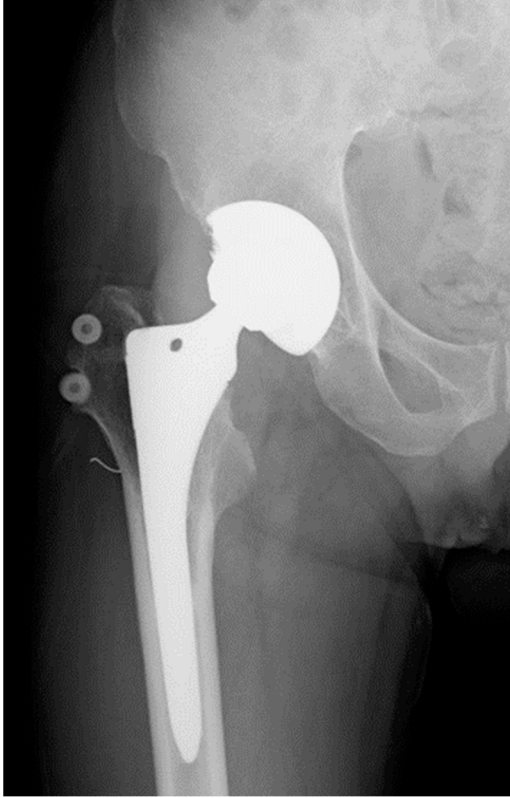

Figure S4. Radiographs of the right hip of a 57-year-old man.

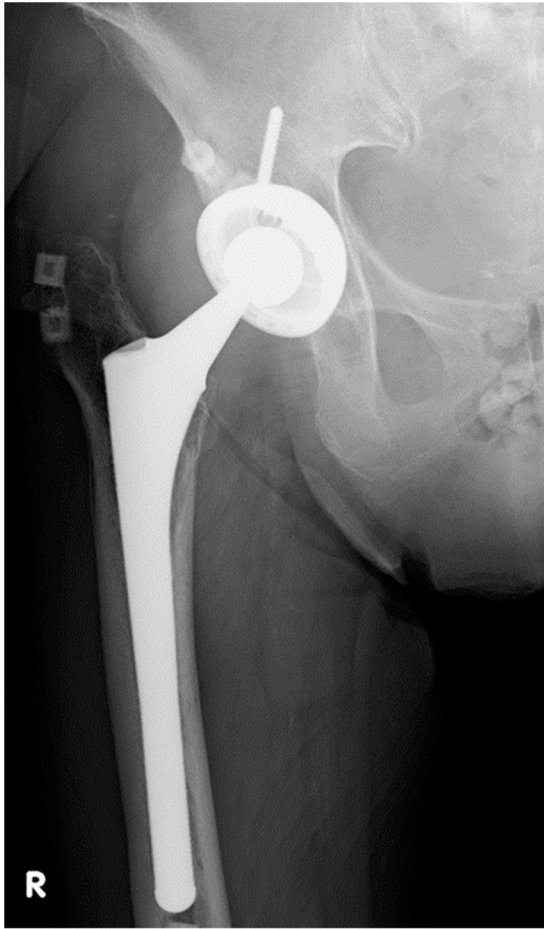

Figure S5. Radiographs of the right hip of a 69-year-old woman.
